# Supplementary material
Source: publisher figshare collection journal article supplement (https://rs.figshare.com/ndownloader/files/13114631)
Supplement: Supplementary file 1 [file 13114631]

**
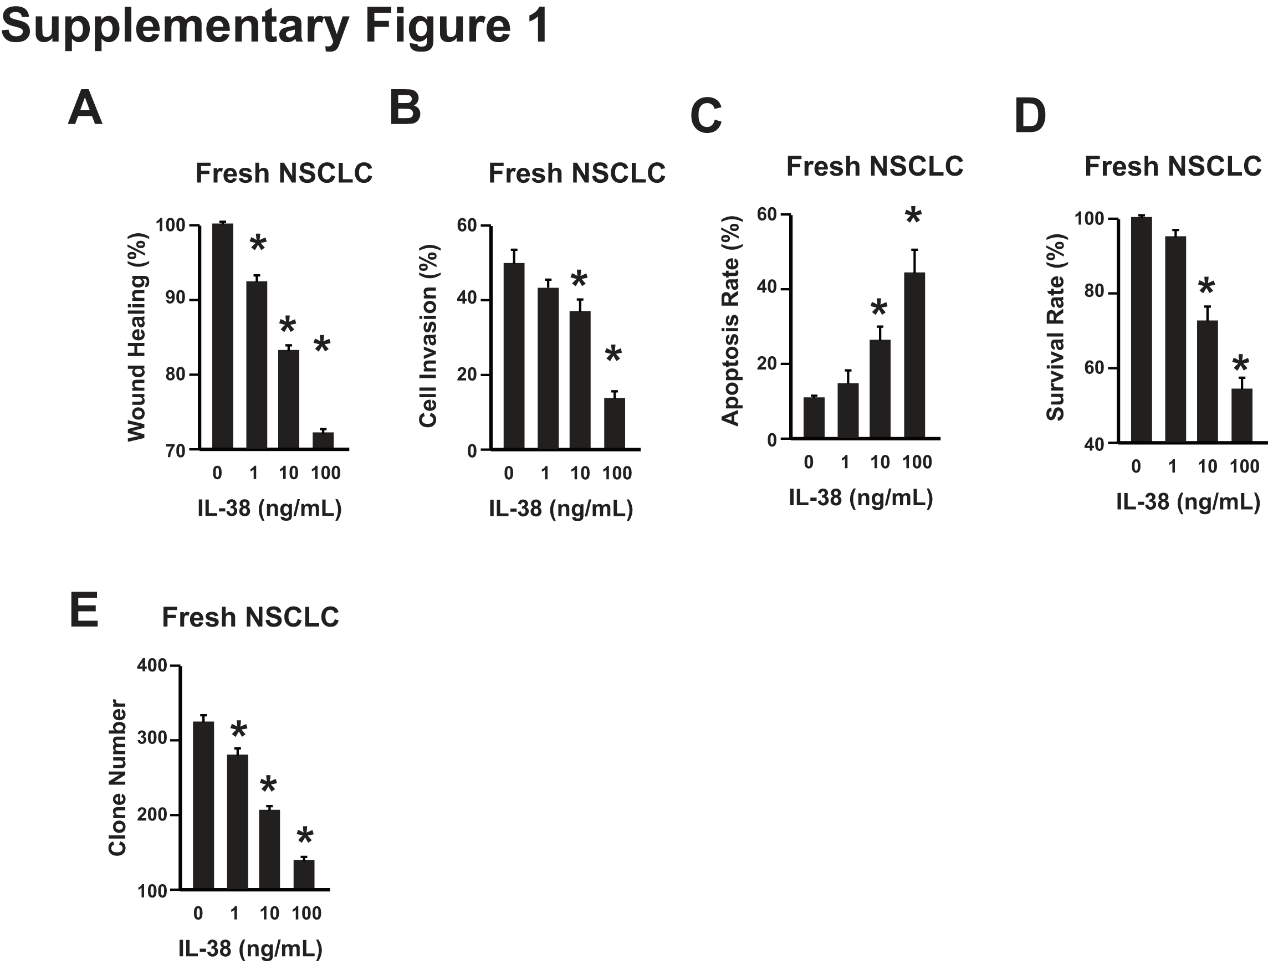
**

**Figure S1**. IL-38 suppresses freshly isolated NSCLC cells in a dose-dependent manner. (**A**) Wound healing assay of freshly isolated NSCLC cells with different concentrations of rhIL-38 protein (0, 1, 10, 100 ng/mL). n = 3. * *P*<0.05. (**B**) Cell invasion assay of freshly isolated NSCLC cells with different concentrations of rhIL-38 protein (0, 1, 10, 100 ng/mL). n = 3. * *P*<0.05. (**C**) Analysis of freshly isolated NSCLC cells apoptosis following treatment of rhIL-38. Freshly isolated NSCLC cells were treated at the indicated doses, harvested, and stained with Annexin V-FITC and 7-AAD. Annexin V-FITC-positive apoptotic cells were determined by flow cytometry. n = 3. * *P*<0.05. (**D**) The survival rate of freshly isolated NSCLC cells treated with different concentrations of rhIL-38 (0, 1, 10, 100 ng/mL) were analyzed. n = 3. * *P*<0.05. (**E**) The clone formation number of freshly isolated NSCLC cells treated with different concentrations of rhIL-38 (0, 1, 10, 100 ng/mL) were analyzed. n = 3. * *P*<0.05.
